# Supplementary material
Source: Springer Nature journal article supplement (https://www.springermedizin.de/resource/supplementary/12885_2007_1186_MOESM4_ESM.pdf/9471348)

HMEC HBL100 MCF-7 T47D SKBR-3 MDA231 MDA157 MDA453

A

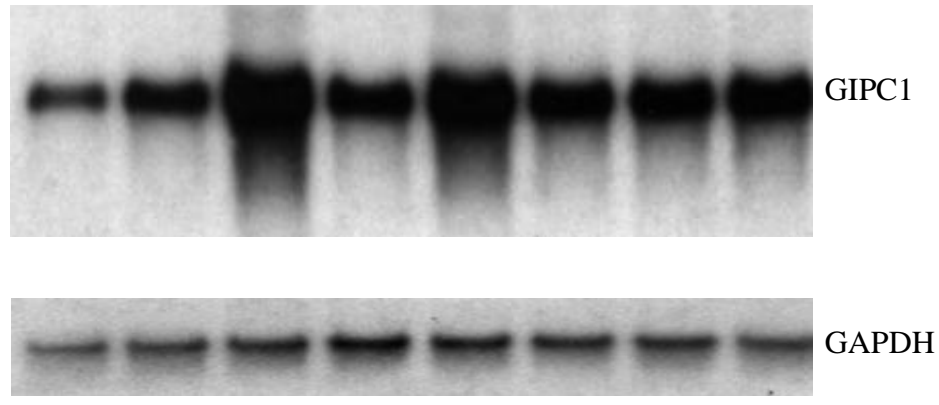

B

**Densitometry Analysis**

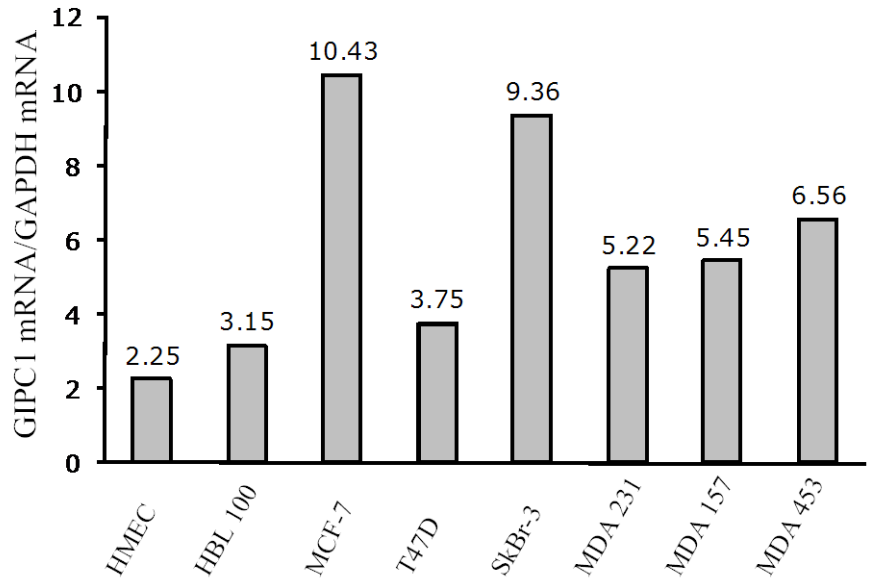

Supplement: MOESM4 [file 9471348]
